# Supplementary material for: Transparent and conducting boron doped ZnO thin films grown by aerosol assisted chemical vapor deposition
Source: Royal Society of Chemistry journal article supplement (doi:10.1039/d2ra05895b), 2022-01-01
Supplement: d2ra05895b1.pdf [file d2ra05895b1.pdf]

## Supporting Information

### Transparent and Conducting Boron Doped ZnO Thin Films Grown By Aerosol

#### Assisted Chemical Vapor Deposition

Donglei Zhao<sup>a</sup>, Sanjayan Sathasivam<sup>a,b</sup>, Mingyue Wang<sup>a</sup> and Claire J. Carmalt<sup>a\*</sup>

\*Corresponding author

(a) Materials Chemistry Centre, Department of Chemistry, University College London, 20

Gordon Street, London WC1H 0AJ, UK

(b) School of Engineering, London South Bank University, London, SE1 0AA

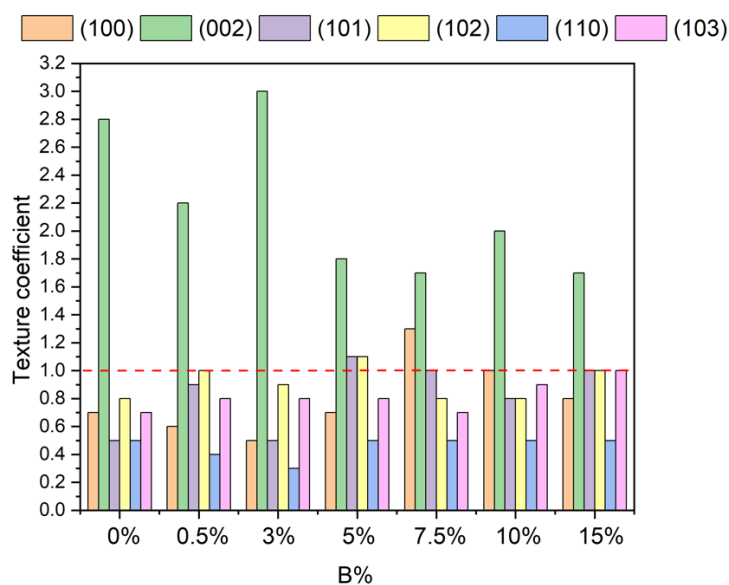

**Figure S1: Texture coefficient determined from the XRD data for pure and B:ZnO films grown using THF as the solvent via an AACVD process.**

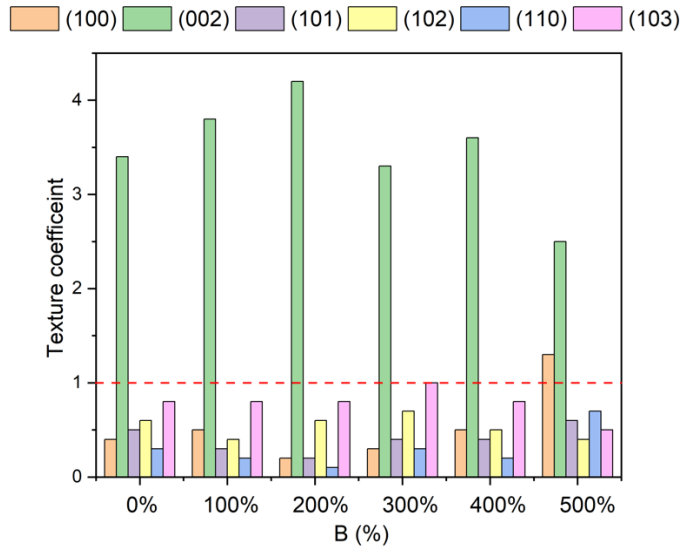

**Figure S2: Texture coefficient determined from the XRD data for pure and B:ZnO films grown using methanol as the solvent via an AACVD process.**

**Table S1: The film thickness from Filmetrics measurement for the ZnO:B thin films from THF solvent grown at 475 °C through AACVD**

| Initial B concentrations (mol.%) | Film thickness<br>(nm) |
|----------------------------------|------------------------|
| 0                                | 180                    |
| 0.5                              | 150                    |
| 3                                | 250                    |
| 5                                | 310                    |
| 7.5                              | 200                    |
| 10                               | 480                    |
| 15                               | 450                    |

**Table S2: The film thickness from Filmetrics measurement for the ZnO:B thin films from MeOH solvent grown at 475 °C through AACVD**

| Initial B concentrations (mol.%) | Film thickness<br>(nm) |
|----------------------------------|------------------------|
| 0                                | 250                    |
| 100                              | 210                    |
| 200                              | 190                    |
| 300                              | 230                    |
| 400                              | 840                    |
| 500                              | 530                    |
